# Supplementary material
Source: PubMed Central journal article supplement (PMC519135)
Supplement: mbc_E04-02-0139_1.pdf [file mbc_E04-02-0139_1.pdf]

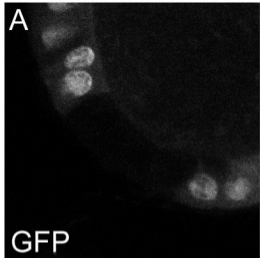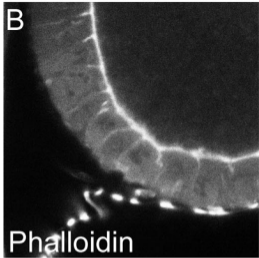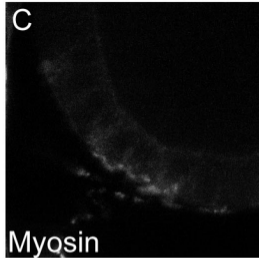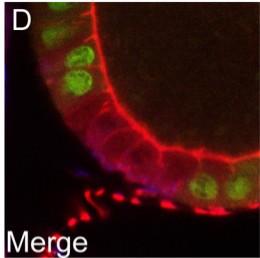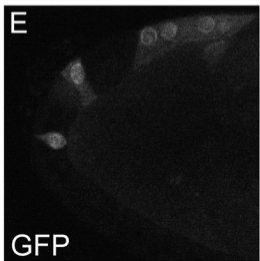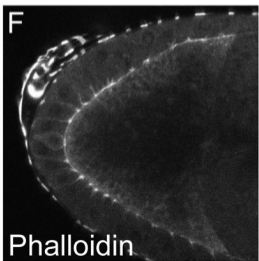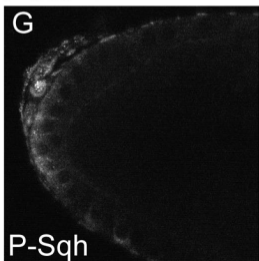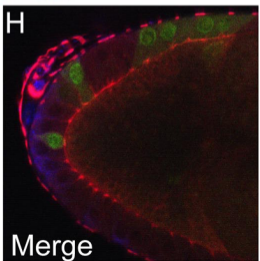

Supplementary Figure 1. Basal accumulation of myosin or P-Sqh in *flw*<sup>6</sup> clones does not disrupt filamentous actin.

Egg chambers containing follicle cell *flw*<sup>6</sup> clones double labelled with TRITC-phalloidin (B, F, red in merge) to reveal F-actin and anti-myosin heavy chain (C, blue in D) or anti-P-Sqh (G, blue in H). *flw*<sup>6</sup> homozygous cells are marked by the absence of GFP (A, E, green in merge). Clones of mutant cells show accumulation of myosin (A-D) or P-Sqh (E-H) specifically in the basal region of the cells. No defects in the actin cytoskeleton are apparent.
